# Supplementary material for: Genome-Wide Identification and Expression Analysis of MADS-Box Family Genes in Litchi (Litchi chinensis Sonn.) and Their Involvement in Floral Sex Determination
Source: MDPI journal article supplement (doi:10.3390/plants10102142), 2021-10-09
Supplement: s1 [file s1]

Table S3 Primers used in this study.

| ID              | Name            | Forward primer (5'-3')   | Reverse primer (5'-3')  |
|-----------------|-----------------|--------------------------|-------------------------|
| LITCHI005352.m1 | LcMADS95(AP1)   | CCCTAATGCACTCTCCTTCCT    | CTGGGTTTCTTGTTTGCATTCA  |
| LITCHI006530.m1 | LcMADS75(AP3-1) | AGCCCTACCACAACCTACGAA    | TTCACCAATCCTCTGCCTGA    |
| LITCHI010203.m1 | LcMADS45(AP3-2) | TCTGTGAAGGTTGTTCTGTGA    | AGATGGGCAGCTGAGTTTAAA   |
| LITCHI011302.m1 | LcMADS50(PI)    | GGGAGATGGCAATGGAGAAT     | ATAGGCTGAACACGGAATGC    |
| LITCHI028933.m1 | LcMADS65(AG)    | AGAATGAGCTGTTGTTTTTCGG   | TGCCGTATGTCCACTAAATGT   |
| LITCHI011705.m1 | LcMADS51(STK)   | GGATTGCGGACATTGAGAGG     | TGGAGCAGTTTCTTGTCAGGA   |
| LITCHI026995.m1 | LcMADS11(SHP)   | ACACAAGTTGGAGAGCAGTC     | GGCCAGTTTATCATGAGTCATCT |
| LITCHI019333.m4 | LcMADS100(SEP1) | TGAGGGCTTACAACGAACTCA    | AGGATGATTCTAGCTGACGC    |
| LITCHI005351.m1 | LcMADS94(SEP2)  | GCCCTACAACGCTCACAAAG     | TCCCAATGAACTGTCTAGGT    |
| LITCHI004634.m1 | LcMADS91(SEP3)  | CCAAGTGCAGAAGATGTGGG     | GTTCACTTGGACCGGC        |
| LITCHI023328.m1 | LcMADS73(SEP4)  | TTGACCAGCTTGCGGATCTT     | TAGGCAGCAAGAGAGTGGTC    |
| LITCHI007623.m1 | LcActin         | ACCGTATGAGCAAGGAAATCACTG | TCGTCGTAACCTTTGAAATC    |
