# Supplementary material for: Genome-Wide Identification and Expression Analysis of MADS-Box Family Genes in Litchi (Litchi chinensis Sonn.) and Their Involvement in Floral Sex Determination
Source: MDPI journal article supplement (doi:10.3390/plants10102142), 2021-10-09
Supplement: s1 [file s1]

Table S2 Motif sequences identified by MEME tools in litchi MADS-box genes.

| <b>Motif</b> | <b>Length</b> | <b>Best possible match</b>                         |
|--------------|---------------|----------------------------------------------------|
| 1            | 41            | RQVTFSKRRNGLFKKASELSTLCDAEVALIVFSPTGKLYEF          |
| 2            | 15            | MGRGKIEJKRIENET                                    |
| 3            | 24            | RQLLGEDLQGLSIKELQQLQLEKQLE                         |
| 4            | 28            | RVRETKNZLIMEZISELKKKEQQLQEEN                       |
| 5            | 50            | SSSSTKQVIEKYKMNMPNLHRFDQPSLELQLECNTYAMLSREIAEKTREL |
| 6            | 50            | WPSQMGVQEVLSRFKNMPEMERSKKMVNQDSFLRZRIVKANEQLKKQRKD |
| 7            | 21            | GHPSIESVVNRFTGNPPQDS                               |
| 8            | 27            | WEAPIDELNPEQLEELKAALEKLKKKV                        |
| 9            | 29            | AHRNANIQELNMZLTDLLNZLEIEKERGE                      |
| 10           | 15            | SSSSMEKTJERYQKC                                    |
| 11           | 21            | QSWQQEYAKLKQQIZNLQRSQ                              |
| 12           | 41            | LHHIYQGNGFDALNVNDFHSLIWFAQEKRKEIKKRVLYLQQ          |
| 13           | 41            | FASCWDDRLNSFSIDQLRVLLVTFDNNIEIARTRIATIKGD          |
| 14           | 50            | NDIAIGLQQFGNFGTGGGGNASGQDMRLPTEFFDPNIMTSDIGLPYDVTK |
| 15           | 41            | GSHDNZGVIWTPDGGHHDGLIFDDEYPLNDLVGLDEIDYBP          |
| 16           | 29            | QYLKDIEKKIETHNQMAAGGSSSSSSTAA                      |
| 17           | 50            | QMELVDYRNYPYFGGFNGAETTMRLQPYEGFKGLMNIGGMNVPMQLQPQP |
| 18           | 15            | NSSDTSCLKLGLAFPS                                   |
| 19           | 48            | LZEKVAEKKKILSEWKNPEKIDDLEKJEIMENHLAESLEBIKAKKEEL   |
| 20           | 29            | EVELIRKENKETLKKLEERKKNRGEKTG                       |
