# Supplementary material for: Genome-Wide Identification and Expression Analysis of MADS-Box Family Genes in Litchi (Litchi chinensis Sonn.) and Their Involvement in Floral Sex Determination
Source: MDPI journal article supplement (doi:10.3390/plants10102142), 2021-10-09
Supplement: s1 [file s1]

**Fig S1.** The pictures of three types of litchi flowers and inflorescences.

**Fig S2.** Litchi MADS-box **protein domains**. Green boxes indicate MADS domain, and yellow boxes **indicate** K domain.

**Fig S3.** Expression profiles of litchi MADS-box genes in various floral organs. Heatmap result was done by column. Scaled log<sub>2</sub> expression values are shown from white to red, indicating low to high expression. M-carpel, the pistils in full-bloom functionally male flower (Male, M); M-stamen, the stamens in full-bloom functionally male flower (Male, M); F-carpel, the pistils in full-bloom functionally female flower (Female, F); F-stamen, the stamens in full-bloom functionally female flower (Female, F); m-carpel, the pistils in full-bloom functionally male flower (male, m); m-stamen, the stamens in full-bloom functionally male flower (male, m).

**Fig S4.** Expression profiles of litchi MADS-box genes at five developmental stages of flower. Heatmap was created based on the FPKM values of litchi MADS-box genes from the transcriptome data. The normalization was done by column. F1, 0.5-1 cm female flower buds; F2, 1-1.5 cm female flower buds; F3, 1.5-2 cm female flower buds; F4, half-bloom female flowers; F5, full bloom female flowers; M1, 0.5-1 cm male flower buds; M2, 1-1.5 cm male flower buds; M3, 1.5-2 cm male flower buds; M4, half-bloom male flower; M5, full bloom male flowers.

**Fig S5.** Expression confirmation of four BC class genes using q-PCR in litchi floral organ.

**Fig S6.** Expression confirmation of four BC class genes using q-PCR at different female development stages.

**Fig S7.** Expression confirmation of four BC class genes using q-PCR at different male development stages.

**Table S1.** The MADS-box transcription factors identified in litchi.

**Table S2.** Motif sequences identified within the litchi MADS-box genes using the MEME tool.

**Table S3.** Primers used in this study.

**Table S4.** Cis-elements within 2-kb upstream of transcription start codon of litchi MADS-box genes.
